# Supplementary material for: ssRNA base pairing at a bilayer interface can be controlled by the acyl chain order
Source: Royal Society of Chemistry journal article supplement (doi:10.1039/c2sm06700e), 2012-01-01
Supplement: c2sm06700e.pdf [file c2sm06700e.pdf]

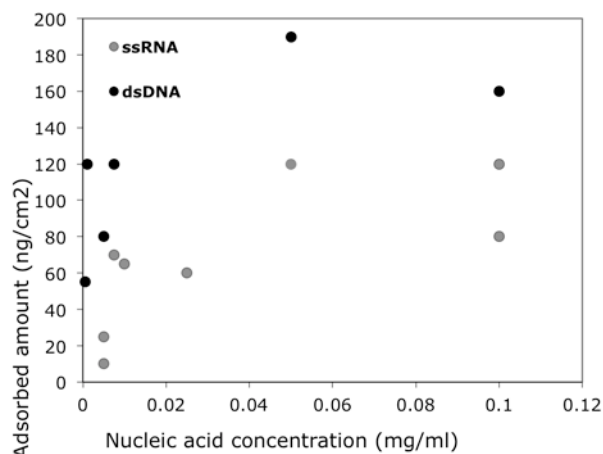

Figure S1: Adsorption of ssRNA<sub>10-polyA</sub> and of dsDNA<sub>2000</sub> to a mixed DOPC/DOTAP 30:70 bilayers for varying bulk concentration of RNA or DNA, presented as adsorbed amount per surface area, versus bulk concentration. T=25°C.

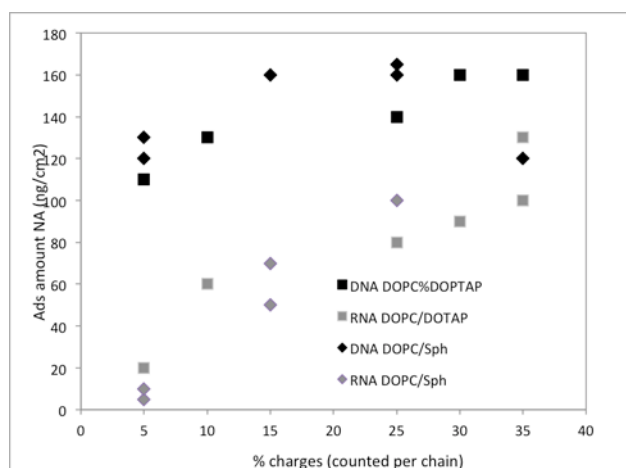

Figure S2: Adsorption of ssRNA<sub>10-polyA</sub> and of dsDNA<sub>2000</sub> to DOPC/DOTAP and DOPC/Sphingosine bilayers with varying amounts of charged lipids. Data are presented both as adsorbed amount per surface area. The percentage of charged chains refers to the number of head group charges averaged over the number of chains. T=25°C.

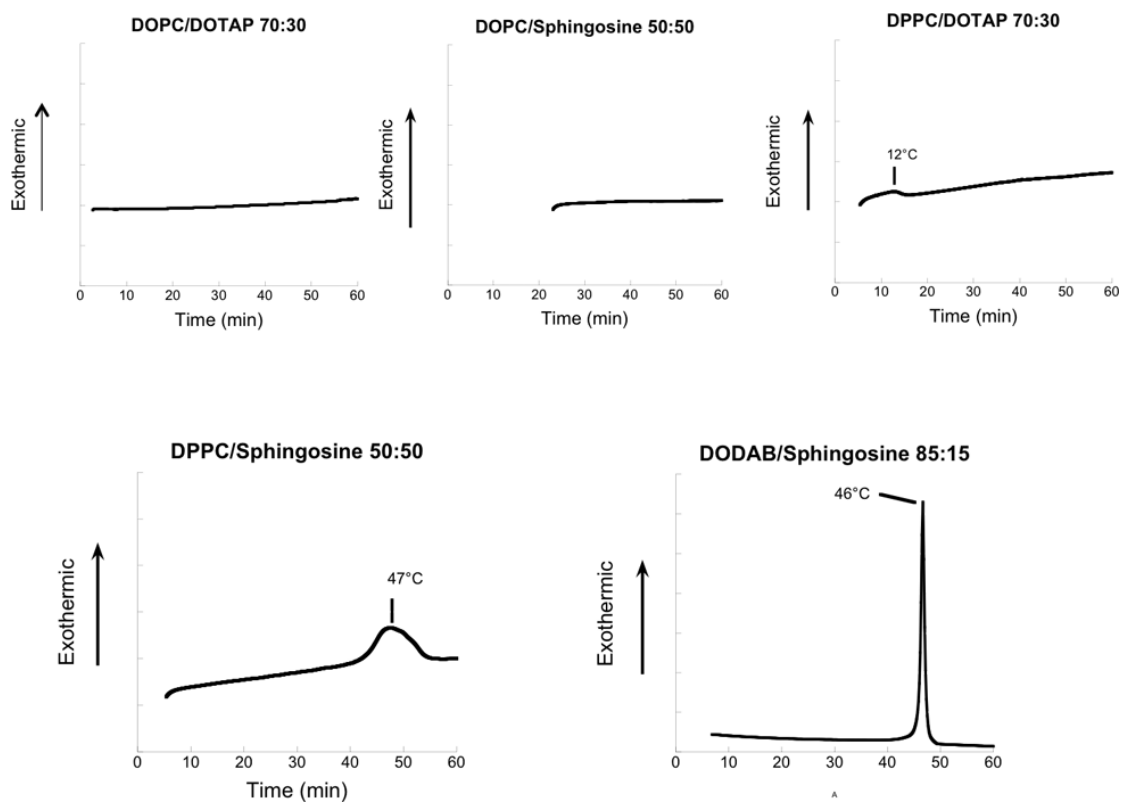

Figure S3: DSC traces for different lipid mixtures used. Compositions refer to molar ratios.
